# Supplementary material for: Prevalence and Predictors of Obesity-Related Counseling Provided by Outpatient Psychiatrists in the United States
Source: Atypon-hosted journal article supplement (doi:10.1176/appi.ps.201500345), 2016-07-01
Supplement: appi.ps.201500345.ds001.pdf [file appi.ps.201500345.ds001.pdf]

**Supplement Table 1. Associations between patient, visit, and practice characteristics with the measurement of body mass index during an outpatient psychiatry visit (N = 7,309 visits)**

| Characteristics                     | BMI Measurement |     |     | OR          | 95%CI      | p    |
|-------------------------------------|-----------------|-----|-----|-------------|------------|------|
|                                     | N               | n   | %   |             |            |      |
| <b>Patient</b>                      |                 |     |     |             |            |      |
| Obesity <sup>a</sup>                |                 |     |     |             |            |      |
| No                                  | 6688            | 549 | 8%  | <i>Ref.</i> |            |      |
| Yes                                 | 621             | 108 | 17% | 2.31        | 1.63-3.27  | <.01 |
| Gender                              |                 |     |     |             |            |      |
| Female                              | 4441            | 396 | 9%  | <i>Ref.</i> |            |      |
| Male                                | 2868            | 261 | 9%  | 1.01        | .86-1.20   | .89  |
| Race                                |                 |     |     |             |            |      |
| White                               | 6586            | 558 | 8%  | <i>Ref.</i> |            |      |
| Black                               | 490             | 64  | 13% | 1.08        | .71-1.64   | .72  |
| Other                               | 233             | 35  | 15% | 1.98        | .72-5.44   | .19  |
| Age                                 | 7039            | 657 | 9%  | .99         | .98-1.00   | <.01 |
| Expected source of payment          |                 |     |     |             |            |      |
| Private                             | 3556            | 259 | 7%  | <i>Ref.</i> |            |      |
| Medicare                            | 1220            | 144 | 12% | 1.38        | .87-2.19   | .18  |
| Medicaid                            | 949             | 149 | 16% | 1.41        | .88-2.26   | .15  |
| Self-pay                            | 1967            | 99  | 5%  | .54         | .30-.99    | .05  |
| Other                               | 172             | 30  | 17% | 1.95        | .67-5.64   | .22  |
| Antipsychotic medication            |                 |     |     |             |            |      |
| No                                  | 5503            | 460 | 8%  | <i>Ref.</i> |            |      |
| Yes                                 | 1806            | 197 | 11% | .79         | .57-1.09   | .15  |
| Primary diagnosis                   |                 |     |     |             |            |      |
| Affective                           | 3596            | 308 | 9%  | <i>Ref.</i> |            |      |
| Schizophrenia/other psychosis       | 663             | 123 | 19% | 2.15        | 1.38-3.35  | <.01 |
| Anxiety                             | 1364            | 112 | 8%  | 1.33        | .95-1.85   | .09  |
| Other                               | 1393            | 110 | 8%  | 1.04        | .61-1.78   | .88  |
| <b>Visit</b>                        |                 |     |     |             |            |      |
| Patient seen before by psychiatrist |                 |     |     |             |            |      |
| No                                  | 380             | 37  | 10% | <i>Ref.</i> |            |      |
| Yes                                 | 6929            | 620 | 9%  | .72         | .45-1.15   | .17  |
| Saw a nurse or physician assistant  |                 |     |     |             |            |      |
| No                                  | 6877            | 517 | 8%  | <i>Ref.</i> |            |      |
| Yes                                 | 432             | 140 | 32% | 5.38        | 2.83-10.24 | <.01 |
| Visit length (minutes)              | 7309            | 657 | 9%  | 1.01        | 1.00-1.02  | .14  |
| Psychiatrist considers self PCP     |                 |     |     |             |            |      |
| No                                  | 6733            | 616 | 9%  | <i>Ref.</i> |            |      |
| Yes                                 | 333             | 18  | 5%  | .65         | .14-3.08   | .59  |
| <b>Practice</b>                     |                 |     |     |             |            |      |
| Geographic region                   |                 |     |     |             |            |      |

|                                |      |     |     |             |           |     |
|--------------------------------|------|-----|-----|-------------|-----------|-----|
| Northeast                      | 2376 | 228 | 10% | <i>Ref.</i> | .         |     |
| Midwest                        | 1287 | 150 | 12% | .99         | .39-2.50  | .98 |
| South                          | 1863 | 155 | 8%  | .69         | .27-1.75  | .43 |
| West                           | 1783 | 127 | 7%  | .51         | .20-1.33  | .17 |
| Private Solo or Group Practice |      |     |     |             |           |     |
| No                             | 1148 | 156 | 14% | <i>Ref.</i> | .         |     |
| Yes                            | 6161 | 501 | 8%  | 1.33        | .67-2.64  | .42 |
| Practice use of EMRs           |      |     |     |             |           |     |
| No electronic                  | 5756 | 406 | 7%  | <i>Ref.</i> | .         |     |
| All or part electronic         | 1473 | 236 | 16% | 2.56        | 1.07-6.10 | .03 |

---

Notes: Data were from the 2005-2010 National Ambulatory Medical Care Surveys. BMI = body mass index, OR = multivariable odds ratio, CI = confidence interval, PCP = primary care provider, EMR = electronic medical record. <sup>a</sup>Patient obesity was determined by provider classification.
